# Supplementary material for: Regulatory Mechanism of Opposite Charges on Chiral Self-Assembly of Cellulose Nanocrystals
Source: MDPI journal article supplement (doi:10.3390/molecules28041857), 2023-02-15
Supplement: s1 [file s1]

---

## Supplementary Material

### **Regulatory mechanism of opposite charges on chiral self-assembly of cellulose nanocrystals**

Bin Wang <sup>a</sup>, Jinyang Xu <sup>a</sup>, Chengliang Duan <sup>a</sup>, Jinpeng Li <sup>a,b,\*</sup>, Jinsong Zeng <sup>a</sup>, Jun Xu <sup>a</sup>, Wenhua Gao <sup>a</sup>, and Kefu Chen <sup>a</sup>

<sup>a</sup> Plant Fiber Material Science Research Center, State Key Laboratory of Pulp and Paper Engineering, School of Light Industry and Engineering, South China University of Technology, Guangzhou 510640, China

<sup>b</sup> Guangdong Provincial Key Laboratory of Plant Resources Biorefinery, Guangzhou, 51006, China

Corresponding Authors

*\* Name. E-mail: \*Jinpeng Li. E-mail: ljp@scut.edu.cn.*

## Supplementary Figures

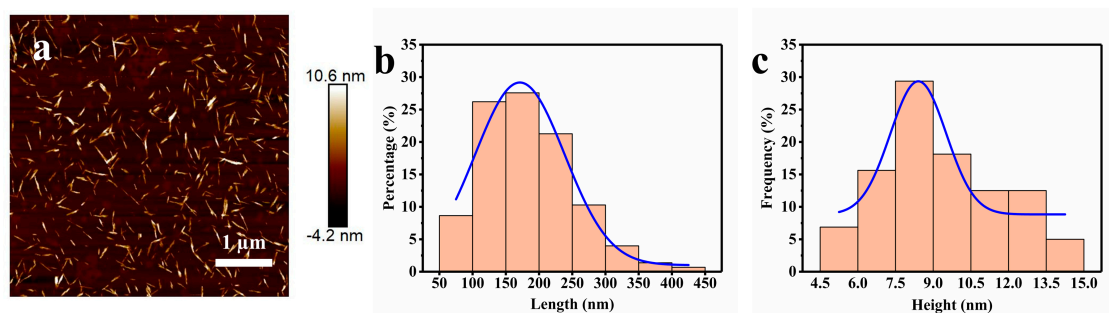

**Figure S1.** (a) AFM images of CNCs, and (b) the length distribution and (c) height distribution, respectively.

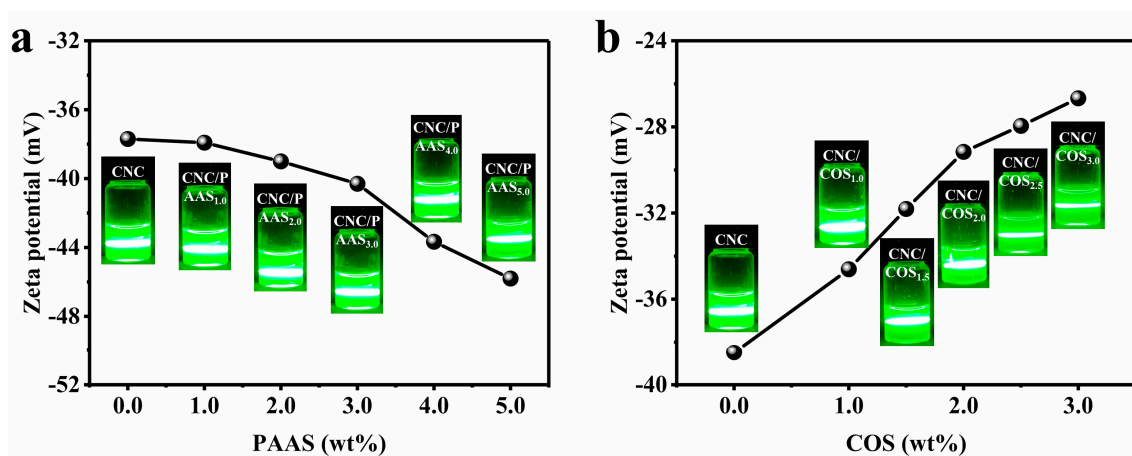

**Figure S2.** Zeta potential and the Tyndall effect of (a) CNC/PAAS mixtures and (b) CNC/COS mixtures, respectively.

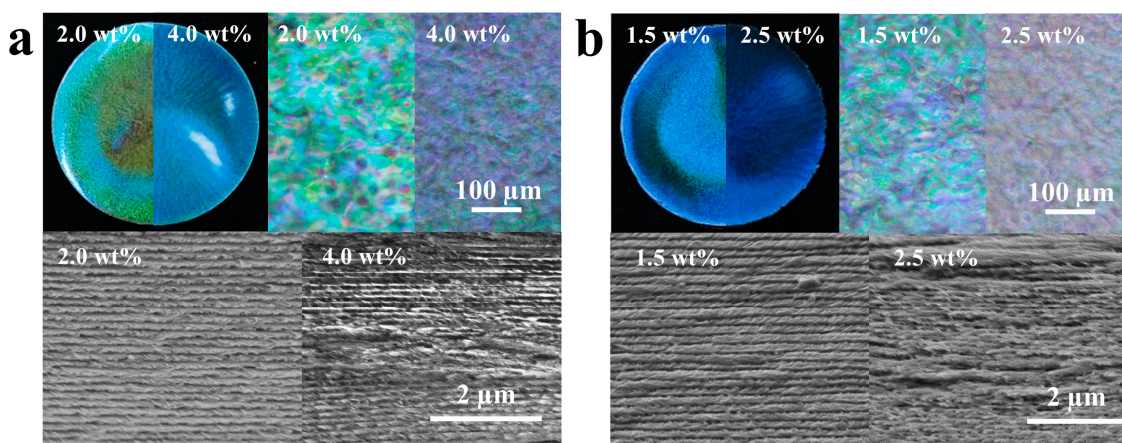

**Figure S3.** The optical photographs (top left), POM patterns (top right) and SEM images (below) of (a) CNC/PAAS films (the ratio of PAAS is 2.0 wt%, 4.0 wt% in order, from left to right), and (b) CNC/COS films (the ratio of COS is 1.5 wt%, 2.5 wt%).

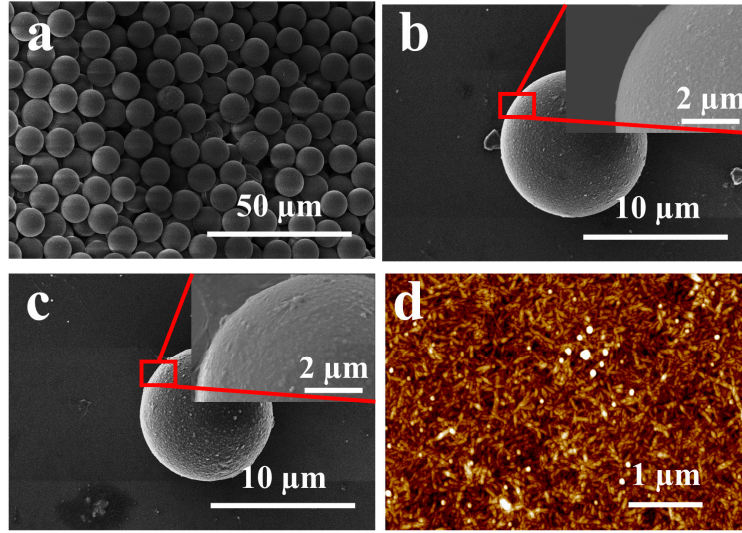

**Figure S4.** SEM images of (a) the amino silica microspheres, (b) the CNC/PAAS-modified silica microsphere, and (c) the CNC/COS-modified silica microsphere. (d) AFM images of CNC/COS-coated substrate.

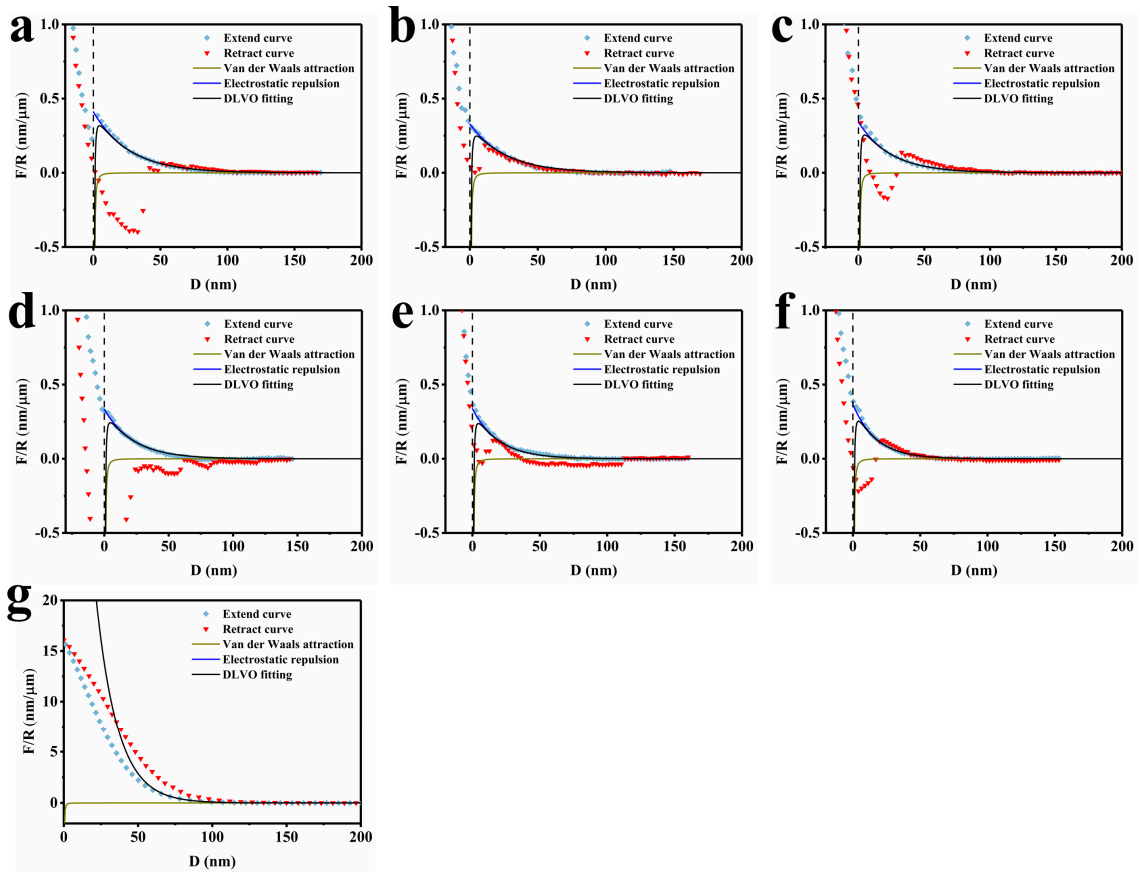

**Figure S5.** The force-distance curves and the DLVO fitting curves of (a) PAAS-CNC, CNC/COS-CNC/COS with (b) 1.0 wt%, (c) 1.5 wt%, (d) 2.0 wt%, (e) 2.5 wt%, and (f) 3.0 wt% COS addition, and (g) PAAS-PAAS, respectively.

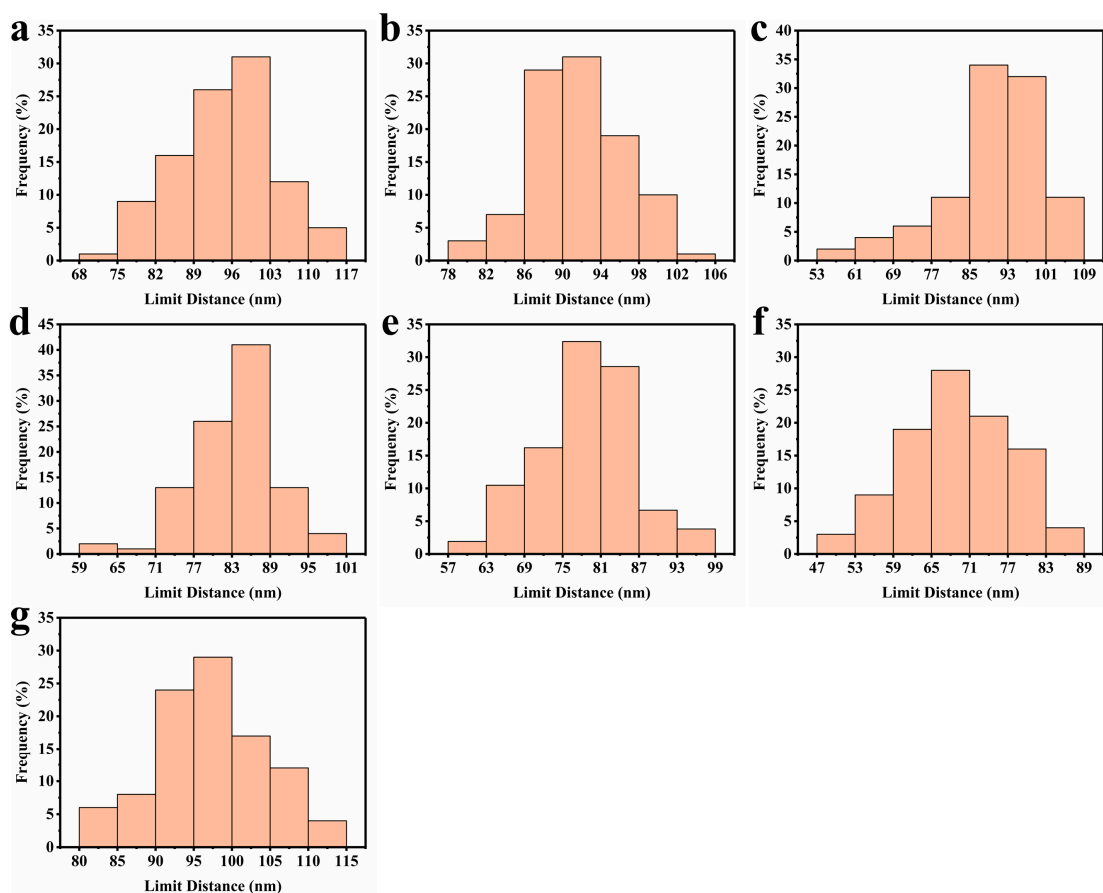

**Figure S6.** Limit distance of the interaction of different groups of samples based on the fitted curves. (a) CNC-CNC. CNC/COS-CNC/COS with (b) 1.0 wt%, (c) 1.5 wt%, (d) 2.0 wt%, (e) 2.5 wt%, and (f) 3.0 wt% COS addition, respectively. (g) PAAS-CNC.

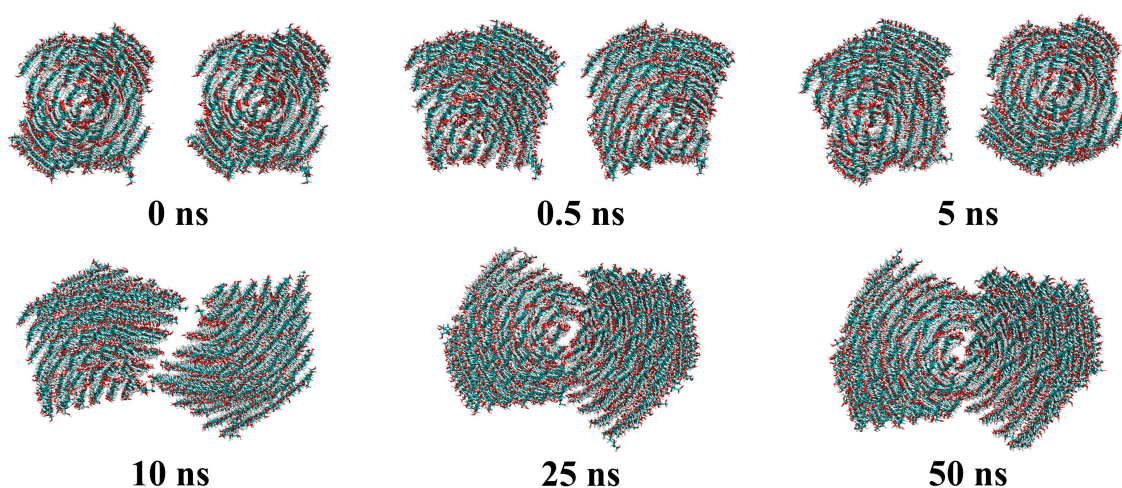

**Figure S7.** Cross-sectional view of the dimer structural equilibrium process.



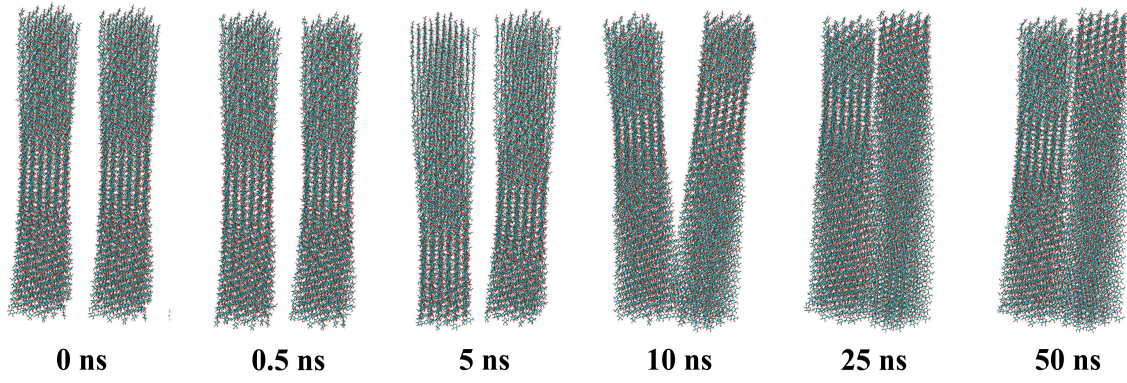

**Figure S8.** Side view of the dimer structural equilibrium process.

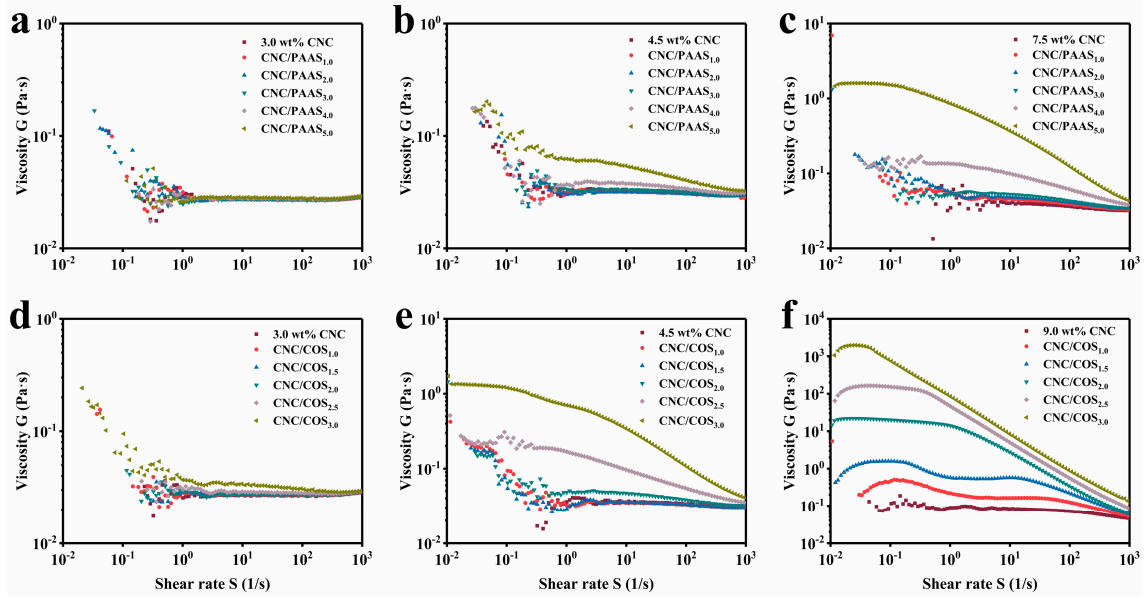

**Figure S9.** The steady viscosity of CNC/PAAS mixtures at (a) 3.0 wt%, (b) 4.5 wt%, and (c) 7.5 wt% concentration, respectively. The steady viscosity of CNC/COS mixtures at (d) 3.0 wt%, (e) 4.5 wt%, and (f) 9.0 wt% concentration, respectively.

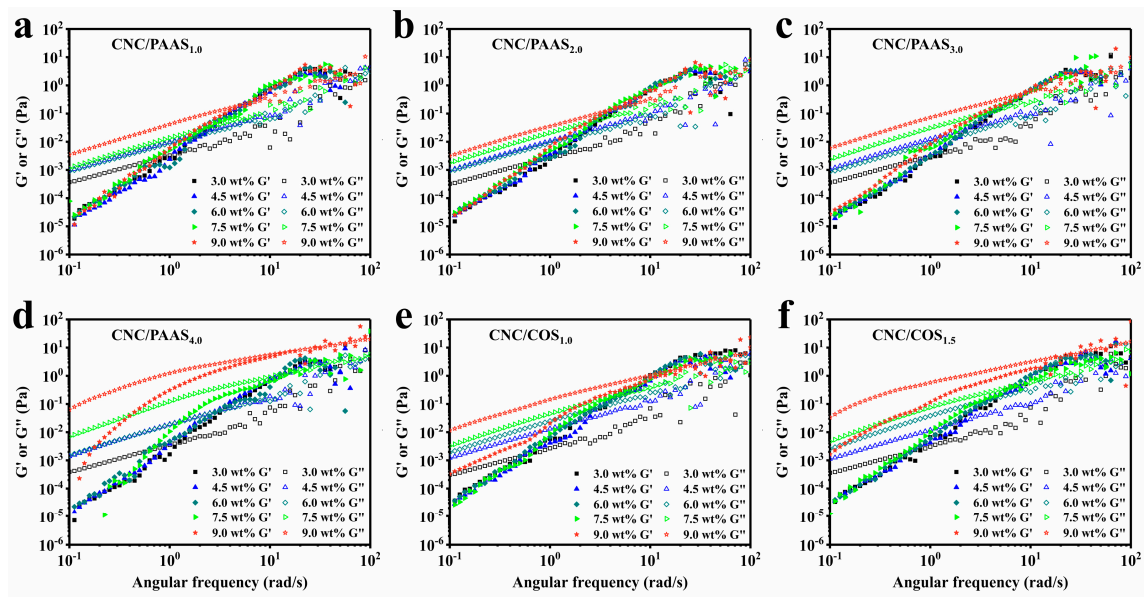

**Figure S10.** (a)-(d) Dependence of  $G'$  and  $G''$  as a function of the angular frequency for CNC/PAAS mixtures with 1.0 wt%-4.0 wt% PAAS addition. (e)-(f) Dependence of  $G'$  and  $G''$  as a function of the angular frequency for CNC/COS mixtures with 1.0 wt% and 1.5 wt% COS addition, respectively.
